# Supplementary material for: Impact of disease on diversity and productivity of plant populations
Source: PubMed Central journal article supplement (PMC4974914; doi:10.1111/1365-2435.12552), 2015-09-23

**Fig. S1.** Fitness of four *Arabidopsis thaliana* genotypes grown in monoculture and 2-way genotype mixtures and in the presence and absence of *Hyaloperonospora arabidopsidis* (*Hpa*). a) Reproductive fitness indicated by mean seed mass produced per plant. b) Vegetative fitness indicated by mean rosette diameter. Error bars show 95% confidence interval of mean. N=1600.

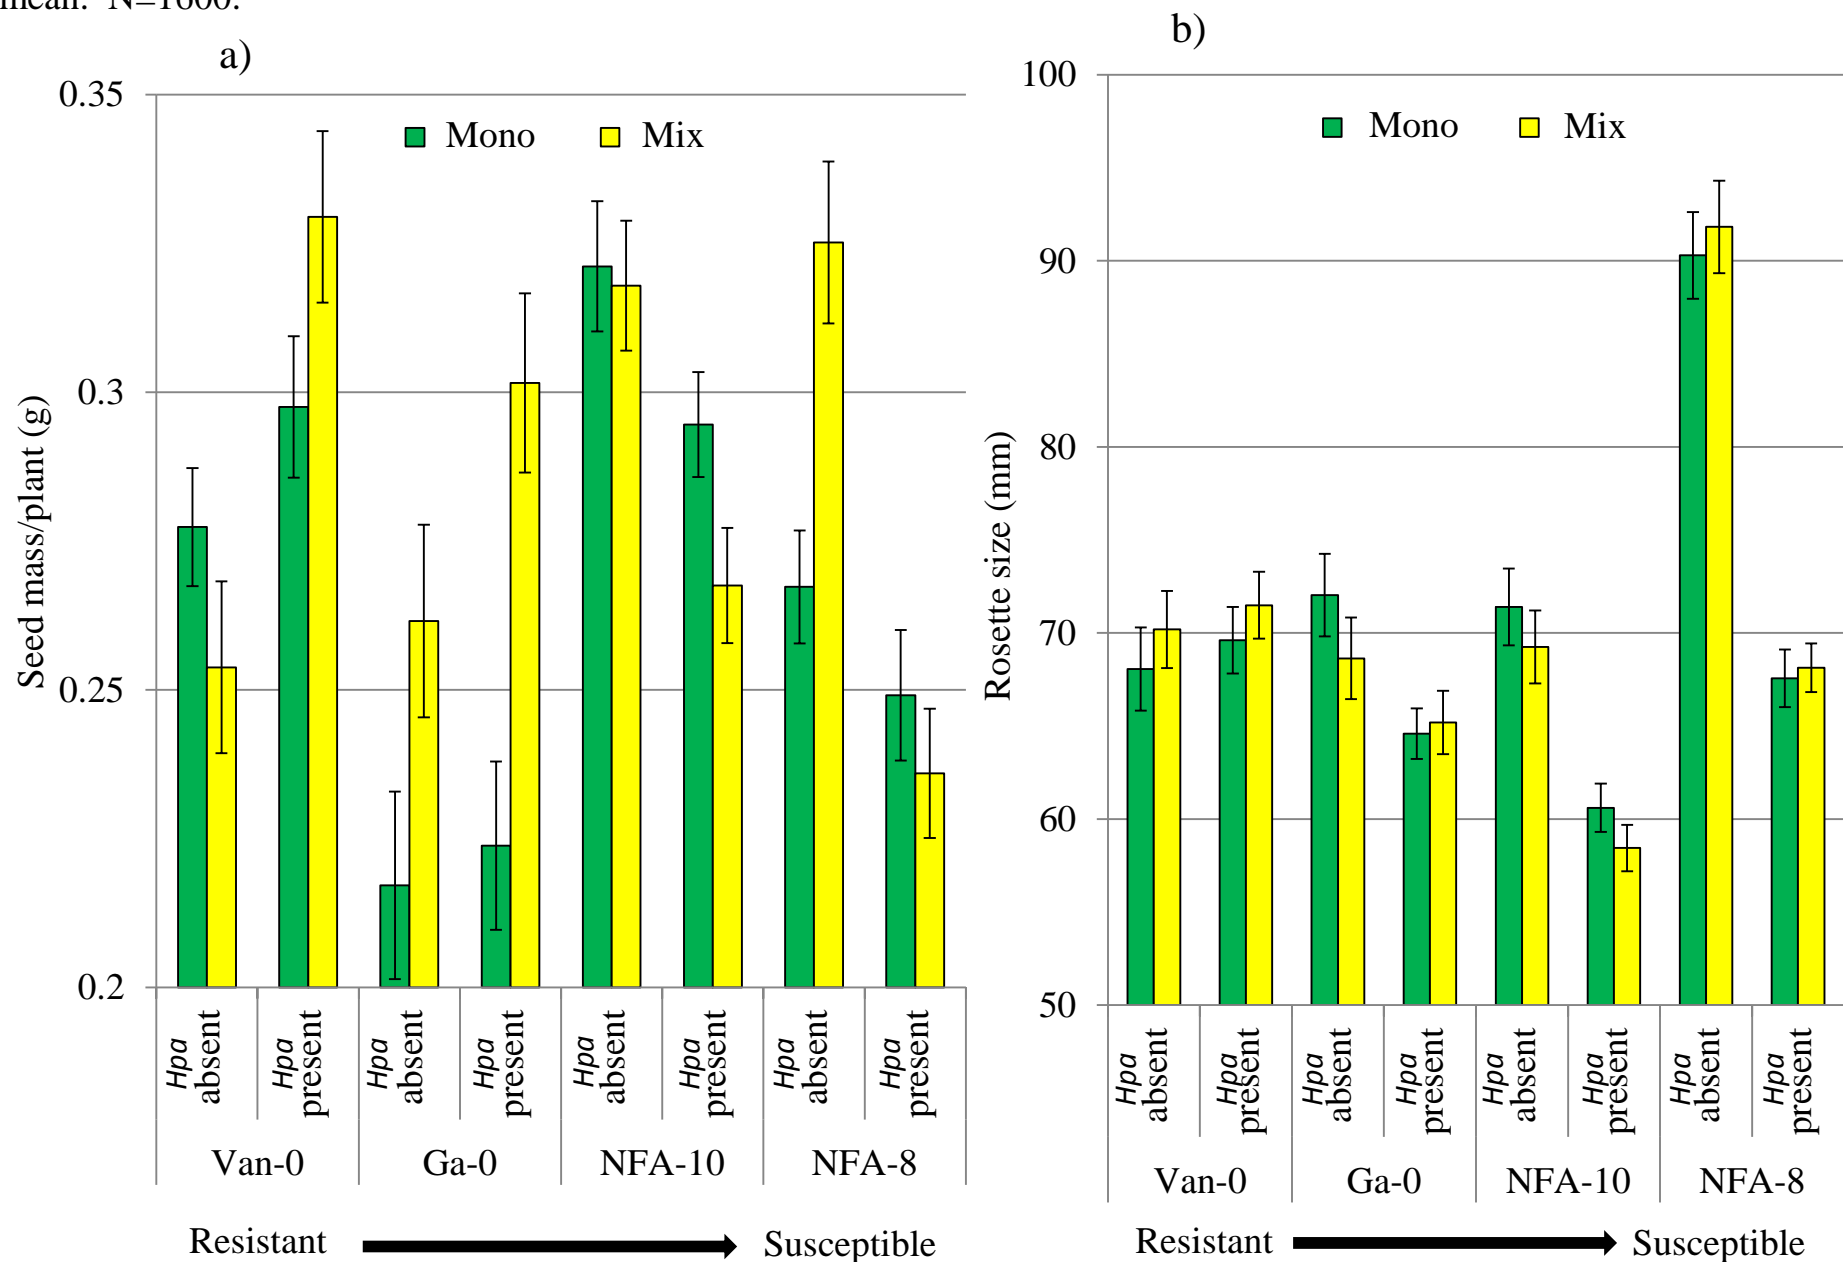

Supplement: FEC-30-649-s002.pdf [file FEC-30-649-s002.pdf]
