# Supplementary material for: Impact of disease on diversity and productivity of plant populations
Source: PubMed Central journal article supplement (PMC4974914; doi:10.1111/1365-2435.12552), 2015-09-23

**Fig. S4.** Enzyme-linked immunosorbent assay (ELISA) detection of *Turnip yellows virus* for two *Arabidopsis thaliana* genotypes measured as absorbance at 405 nm five weeks post inoculation. N=400. Error bars show 95% confidence interval of means.

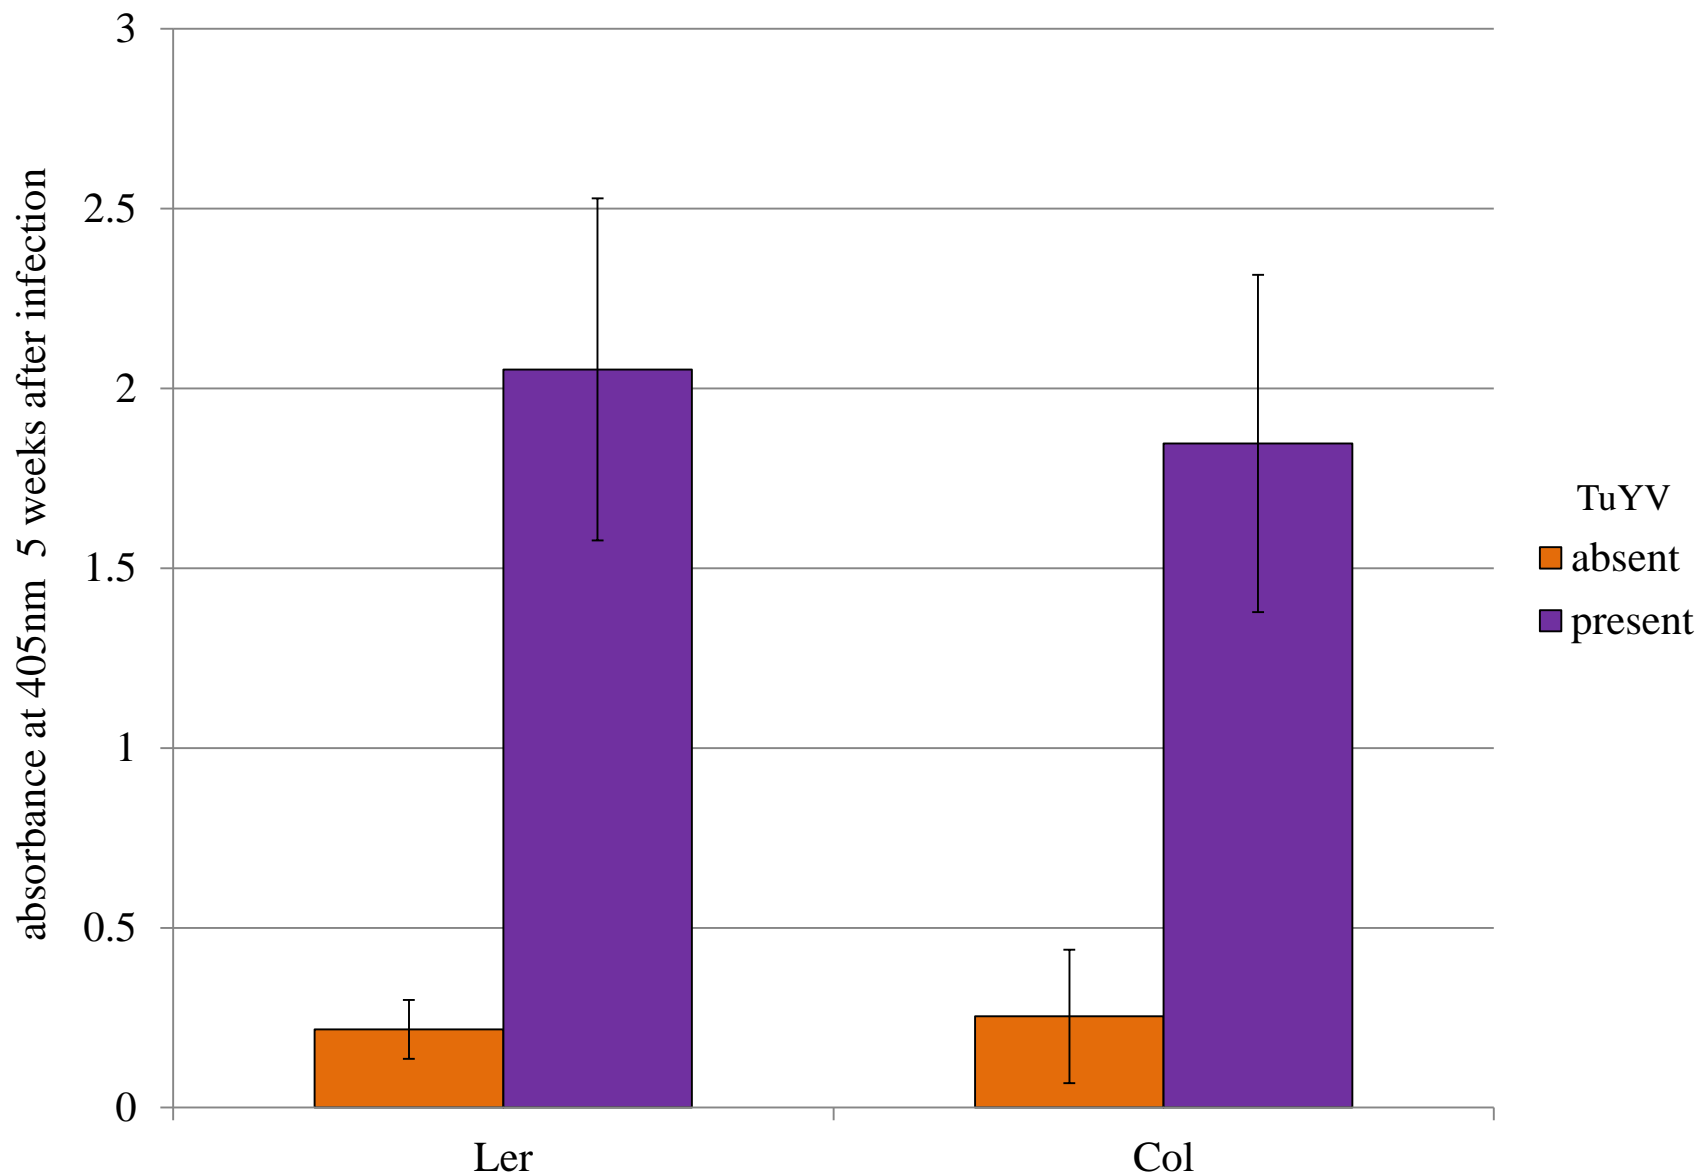

Supplement: FEC-30-649-s005.pdf [file FEC-30-649-s005.pdf]
