# Supplementary material for: Impact of disease on diversity and productivity of plant populations
Source: PubMed Central journal article supplement (PMC4974914; doi:10.1111/1365-2435.12552), 2015-09-23

**Fig. S5.** Photographs of *Turnip yellows virus* (TuYV) infected *Arabidopsis thaliana* after ten weeks growth. **a)** Monoculture of four Col-0 plants. **b)** Monoculture of four Ler-1 plants.

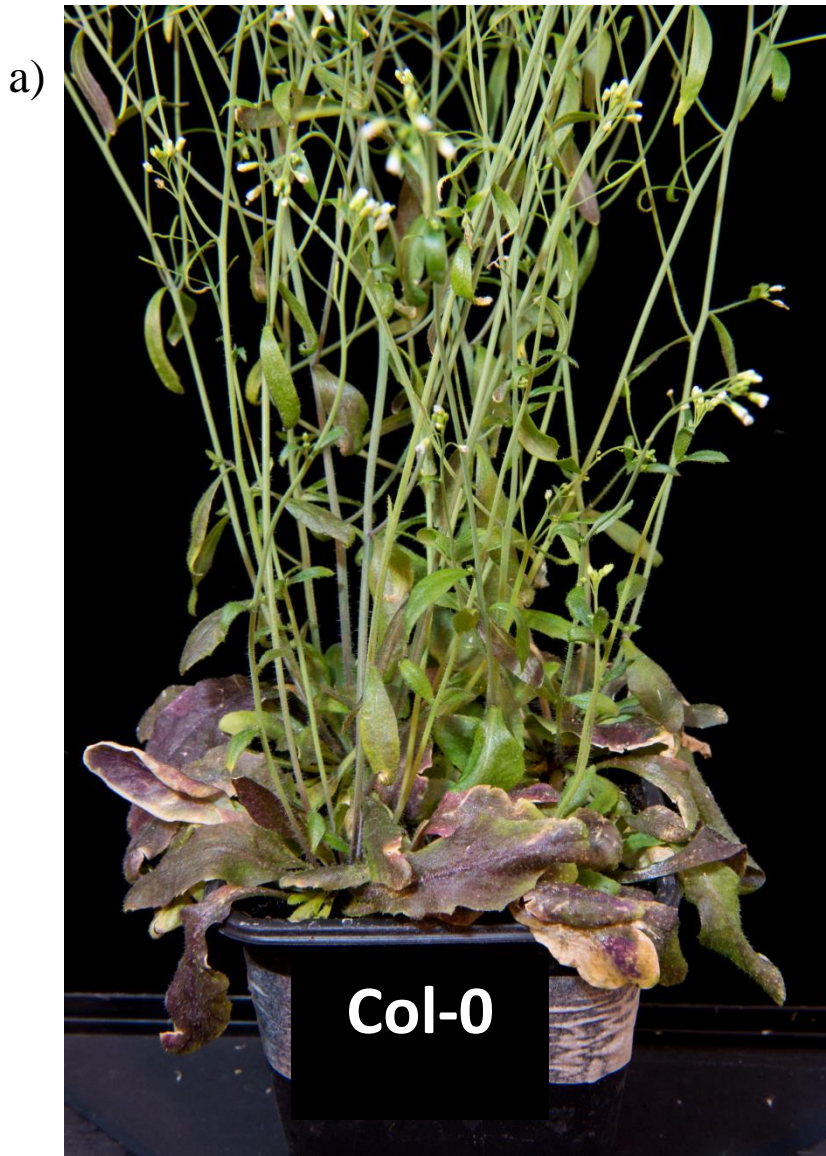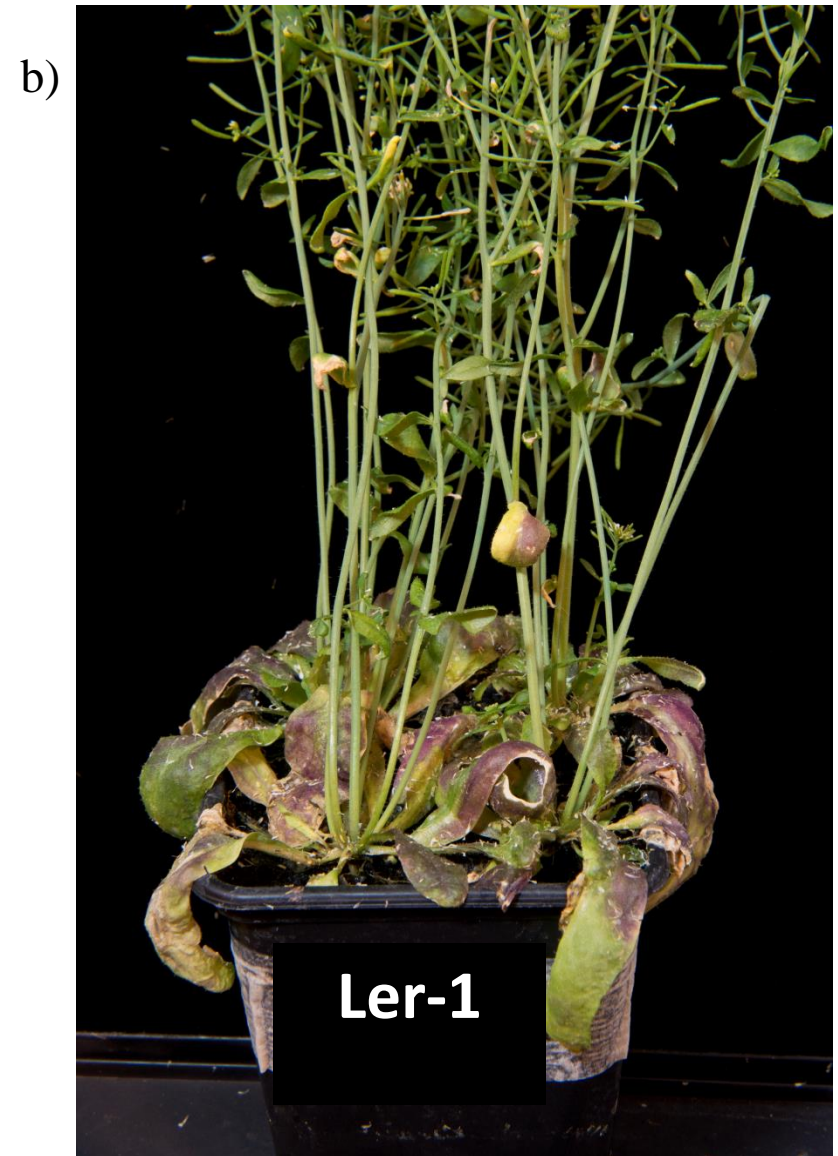

Supplement: FEC-30-649-s006.pdf [file FEC-30-649-s006.pdf]
