# Supplementary material for: Impact of disease on diversity and productivity of plant populations
Source: PubMed Central journal article supplement (PMC4974914; doi:10.1111/1365-2435.12552), 2015-09-23

**Fig. S6.** Phenotypic fitness measurements taken for two *Arabidopsis thaliana* genotypes grown in the presence and absence of *Turnip yellows virus* (TuYV). **a)** Mean number of days taken to flower. **b)** Mean rosette diameter after five weeks growth. **c)** Mean seed mass produced. N=400. Error bars show 95% confidence interval of means.

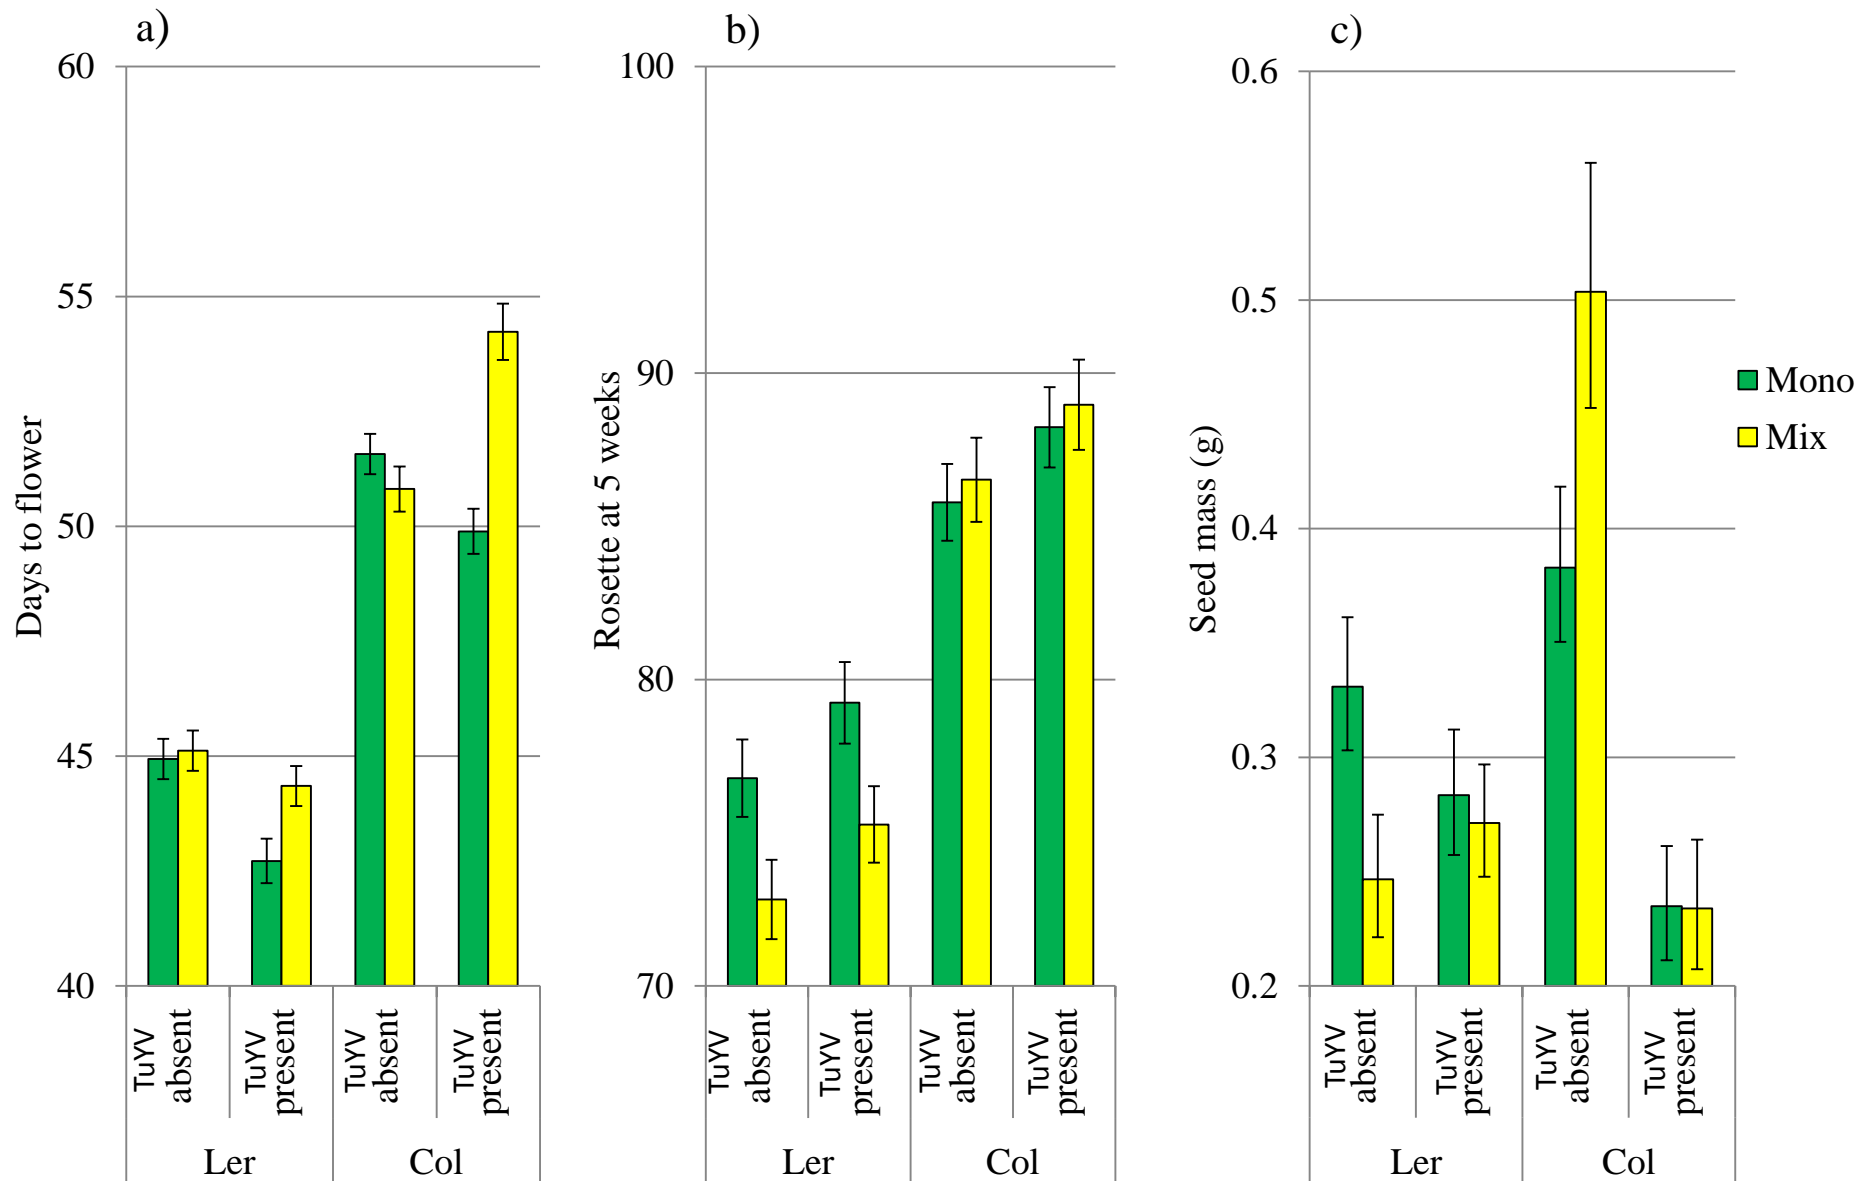

Supplement: FEC-30-649-s007.pdf [file FEC-30-649-s007.pdf]
