# Supplementary material for: Impact of disease on diversity and productivity of plant populations
Source: PubMed Central journal article supplement (PMC4974914; doi:10.1111/1365-2435.12552), 2015-09-23

**Fig. S7.** Mean seed production (g) per pot of four *Arabidopsis thaliana* genotypes grown in monoculture and mixture and in the presence and absence of *Turnip yellows virus* (TuYV). N=400. Error bars show 95% confidence interval of means.

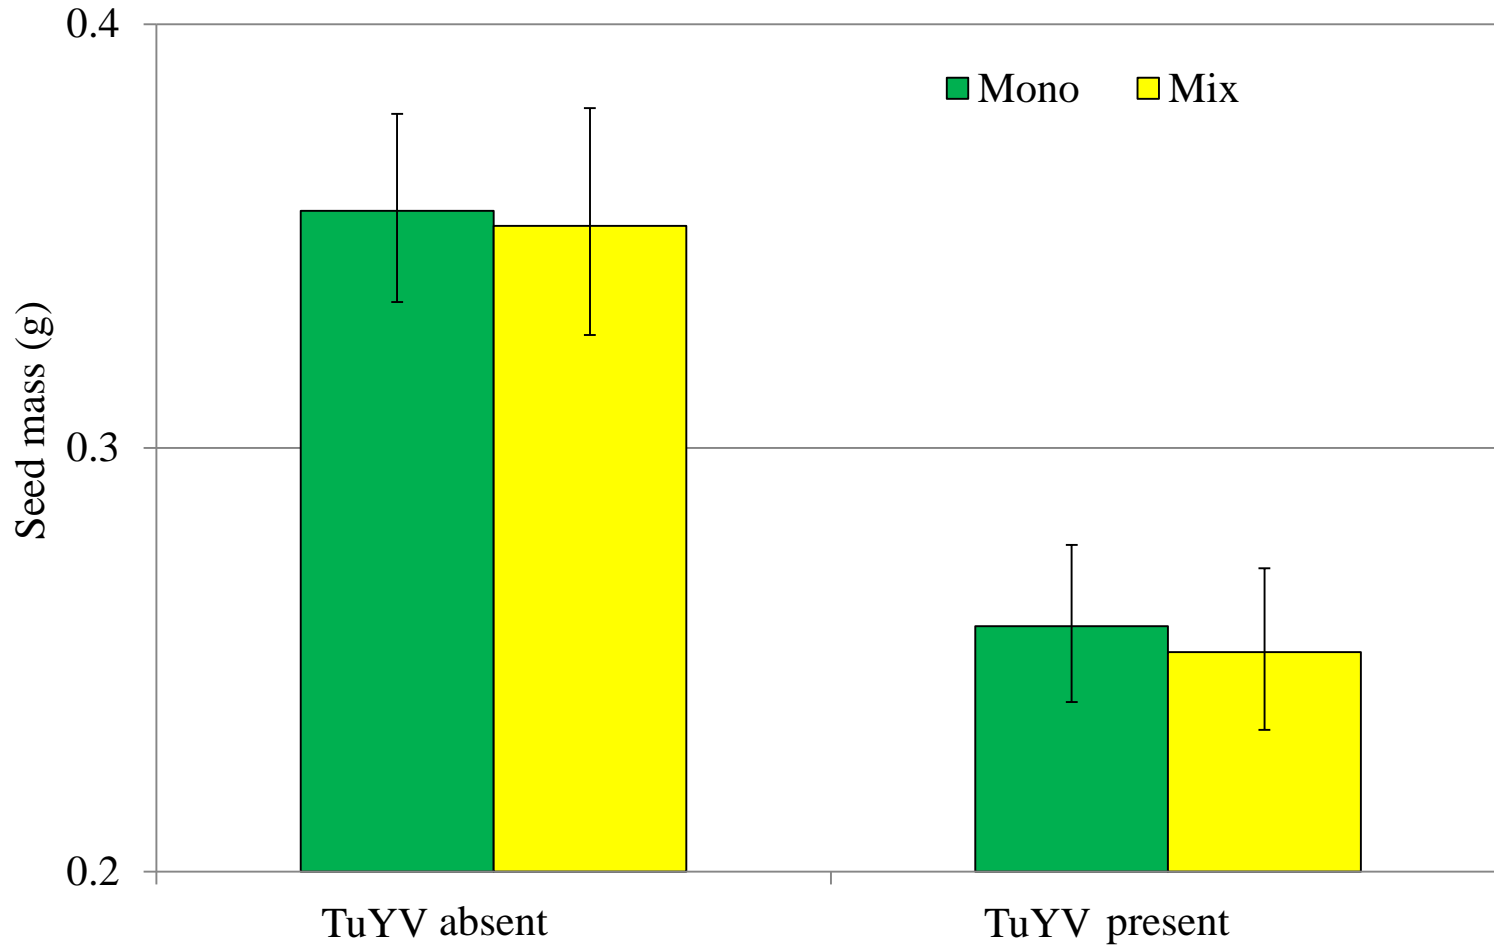

Supplement: FEC-30-649-s008.pdf [file FEC-30-649-s008.pdf]
