# Supplementary material for: Impact of disease on diversity and productivity of plant populations
Source: PubMed Central journal article supplement (PMC4974914; doi:10.1111/1365-2435.12552), 2015-09-23
Supplement: FEC-30-649-s009.pdf [file FEC-30-649-s009.pdf]

**Table S1a.** Mean trait values ( $\pm$  SD) for four *Arabidopsis thaliana* genotypes grown in the absence of competition and the presence or absence of *Hyaloperonospora arabidopsidis* (*Hpa*). N=40 plants/genotype

| Genotype   | Disease score<br>(0-4) | Days taken to<br>flower |            | Rosette diameter at 5<br>weeks (mm) |             | Seed mass (g)   |                 |
|------------|------------------------|-------------------------|------------|-------------------------------------|-------------|-----------------|-----------------|
|            |                        | absent                  | present    | absent                              | present     | absent          | present         |
| <i>Hpa</i> | present                | absent                  | present    | absent                              | present     | absent          | present         |
| Van-0      | 0 $\pm$ 0.2            | 49 $\pm$ 9              | 52 $\pm$ 9 | 72 $\pm$ 19                         | 68 $\pm$ 14 | 0.80 $\pm$ 0.29 | 0.78 $\pm$ 0.25 |
| Ga-0       | 0.2 $\pm$ 0.5          | 53 $\pm$ 6              | 57 $\pm$ 9 | 69 $\pm$ 17                         | 66 $\pm$ 13 | 0.87 $\pm$ 0.31 | 0.88 $\pm$ 0.27 |
| NFA-10     | 1.8 $\pm$ 0.6          | 57 $\pm$ 9              | 56 $\pm$ 7 | 71 $\pm$ 20                         | 61 $\pm$ 11 | 0.93 $\pm$ 0.32 | 1.10 $\pm$ 0.33 |
| NFA-8      | 2.7 $\pm$ 0.7          | 55 $\pm$ 9              | 55 $\pm$ 7 | 88 $\pm$ 22                         | 63 $\pm$ 7  | 0.90 $\pm$ 0.22 | 0.78 $\pm$ 0.22 |

**Table S1b.** Mean trait values ( $\pm$  SD) for two *Arabidopsis thaliana* genotypes grown in the absence of competition and the presence or absence of *Turnip yellows virus* (TuYV). N=40 plants/genotype.

| Genotype | Days taken to<br>flower |            | Rosette diameter at 5<br>weeks (mm) |             | Seed mass (g)   |                 |
|----------|-------------------------|------------|-------------------------------------|-------------|-----------------|-----------------|
|          | absent                  | present    | absent                              | present     | absent          | present         |
| TuYV     | absent                  | present    | absent                              | present     | absent          | present         |
| Col-0    | 54 $\pm$ 2              | 51 $\pm$ 3 | 91 $\pm$ 15                         | 95 $\pm$ 15 | 1.00 $\pm$ 0.28 | 0.66 $\pm$ 0.24 |
| Ler-1    | 45 $\pm$ 3              | 45 $\pm$ 1 | 89 $\pm$ 10                         | 87 $\pm$    | 0.72 $\pm$ 0.14 | 0.72 $\pm$ 0.16 |
