# Supplementary material for: Impact of disease on diversity and productivity of plant populations
Source: PubMed Central journal article supplement (PMC4974914; doi:10.1111/1365-2435.12552), 2015-09-23
Supplement: FEC-30-649-s010.pdf [file FEC-30-649-s010.pdf]

**Table S2.** The effect of *Arabidopsis thaliana* genotypic diversity and *Hyaloperonospora arabidopsidis* (*Hpa*) on seed mass produced per plant in a pair-wise interaction experiment. A linear mixed model was used to analyse each factor and all interactions between them. Fixed effects included experimental repeat, genotype, cultivation (2-way mixture/monoculture) and *Hpa* (presence/absence). Non-significant terms were eliminated from the model. *F* and *P* values refer to ANOVA tests of each factor separately and the interactions between them. N=1600.

| <b>Fixed term</b>                  | <b>F</b> | <b>n.d.f.</b> | <b>d.d.f.</b> | <b>P</b> |
|------------------------------------|----------|---------------|---------------|----------|
| Experiment                         | 209.68   | 1             | 587.1         | <0.001   |
| Genotype                           | 5.69     | 3             | 586.7         | <0.001   |
| Cultivation method                 | 7.34     | 1             | 858.6         | 0.007    |
| <i>Hpa</i>                         | 0.24     | 1             | 586.9         | 0.621    |
| Experiment. Genotype               | 86.57    | 3             | 587.1         | <0.001   |
| Genotype. Cultivation              | 5.30     | 3             | 586.0         | <0.001   |
| Experiment. <i>Hpa</i>             | 58.50    | 1             | 587.1         | <0.001   |
| Genotype. <i>Hpa</i>               | 32.63    | 3             | 587.0         | <0.001   |
| Genotype. <i>Hpa</i> . Experiment  | 6.00     | 3             | 587.2         | <0.001   |
| Genotype. <i>Hpa</i> . Cultivation | 3.54     | 4             | 585.5         | 0.007    |
