# Supplementary material for: Impact of disease on diversity and productivity of plant populations
Source: PubMed Central journal article supplement (PMC4974914; doi:10.1111/1365-2435.12552), 2015-09-23
Supplement: FEC-30-649-s011.pdf [file FEC-30-649-s011.pdf]

**Table S3a.** The effect of *Arabidopsis thaliana* genotypic diversity and *Hyaloperonospora arabidopsidis* on the initial disease score at six days after infection in a pair-wise interaction experiment. Disease was scored as the proportion of leaves showing sporulation. A linear mixed model was used to analyse each factor and all interactions between them. Fixed effects included experimental repeat, genotype and cultivation (2-way mixture/monoculture). Non-significant terms were eliminated from the model. *F* and *P* values refer to ANOVA tests of each factor separately and the interactions between them. N=1600.

| <b>Fixed term</b>      | <b>F</b> | <b>n.d.f.</b> | <b>d.d.f.</b> | <b>P</b> |
|------------------------|----------|---------------|---------------|----------|
| Experiment             | 38.41    | 1             | 334.8         | <0.001   |
| Genotype               | 1.79     | 1             | 362.5         | 0.2      |
| Cultivation            | 664.52   | 3             | 634.3         | <0.001   |
| Experimental. Genotype | 35.43    | 3             | 634.0         | <0.001   |

**Table S3b.** The effect of *Arabidopsis thaliana* genotypic diversity and *Hyaloperonospora arabidopsidis* on the second disease score at ten days after infection in a pair-wise interaction experiment. Disease was scored on a scale of 0-4, with 0=no disease and 4=over 67% of leaf area covered in spores. A linear mixed model was used to analyse each factor and all interactions between them. Fixed effects included experimental repeat, genotype and cultivation (2-way mixture/monoculture). Non-significant terms were eliminated from the model. *F* and *P* values refer to ANOVA tests of each factor separately and the interactions between them. N=1600.

| <b>Fixed term</b>      | <b>F</b> | <b>n.d.f.</b> | <b>d.d.f.</b> | <b>P</b> |
|------------------------|----------|---------------|---------------|----------|
| Experiment             | 0.85     | 1             | 349.2         | 0.4      |
| Genotype               | 0.15     | 1             | 394.1         | 0.7      |
| Cultivation            | 1155.94  | 3             | 631.2         | <0.001   |
| Experimental. Genotype | 4.94     | 3             | 631.1         | 0.002    |
