# Supplementary material for: Impact of disease on diversity and productivity of plant populations
Source: PubMed Central journal article supplement (PMC4974914; doi:10.1111/1365-2435.12552), 2015-09-23
Supplement: FEC-30-649-s012.pdf [file FEC-30-649-s012.pdf]

**Table S4.** The effect of *Arabidopsis thaliana* genotypic diversity and *Hyaloperonospora arabidopsidis* (*Hpa*) on rosette diameter in a pair-wise interaction experiment. A linear mixed model was used to analyse each factor and all interactions between them. Fixed effects included experimental repeat, genotype, cultivation (2-way mixture/monoculture) and *Hpa* (presence/absence). Non-significant terms were eliminated from the model. *F* and *P* values refer to ANOVA tests of each factor separately and the interactions between them. N=1600.

| <b>Fixed term</b>                | <b>F</b> | <b>n.d.f.</b> | <b>d.d.f.</b> | <b>P</b> |
|----------------------------------|----------|---------------|---------------|----------|
| Experiment                       | 2145.41  | 1             | 584.9         | <0.001   |
| Genotype                         | 174.29   | 3             | 584.9         | <0.001   |
| Cultivation                      | 0.08     | 1             | 584.9         | 0.771    |
| <i>Hpa</i>                       | 334.82   | 1             | 584.9         | <0.001   |
| Experiment. Genotype             | 12.57    | 3             | 584.9         | <0.001   |
| Experiment. <i>Hpa</i>           | 146.6    | 1             | 584.9         | <0.001   |
| Genotype. <i>Hpa</i>             | 100.35   | 3             | 584.9         | <0.001   |
| Experiment. Genotype. <i>Hpa</i> | 13.73    | 3             | 584.9         | <0.001   |
