# Supplementary material for: Impact of disease on diversity and productivity of plant populations
Source: PubMed Central journal article supplement (PMC4974914; doi:10.1111/1365-2435.12552), 2015-09-23
Supplement: FEC-30-649-s013.pdf [file FEC-30-649-s013.pdf]

**Table S5.** The effect of *Arabidopsis thaliana* genotypic diversity and *Hyaloperonospora arabidopsidis* (*Hpa*) on days to flower in a pair-wise interaction experiment. A linear mixed model was used to analyse each factor and all interactions between them. Fixed effects included experimental repeat, genotype, cultivation (2-way mixture/monoculture) and *Hpa* (presence/absence). Non-significant terms were eliminated from the model. *F* and *P* values refer to ANOVA tests of each factor separately and the interactions between them. N=1600.

| <b>Fixed term</b>                             | <b>F</b> | <b>n.d.f.</b> | <b>d.d.f.</b> | <b>P</b> |
|-----------------------------------------------|----------|---------------|---------------|----------|
| Experiment                                    | 3265.15  | 1             | 446.3         | <0.001   |
| Genotype                                      | 57.10    | 3             | 434.7         | <0.001   |
| Cultivation                                   | 0.008    | 1             | 429.3         | 0.771    |
| <i>Hpa</i>                                    | 2.49     | 1             | 426.0         | 0.115    |
| Experiment. Genotype                          | 11.89    | 3             | 544.4         | <0.001   |
| Experiment. <i>Hpa</i>                        | 39.83    | 1             | 443.5         | <0.001   |
| Genotype. <i>Hpa</i>                          | 8.83     | 3             | 433.7         | <0.001   |
| Experiment. Genotype. Cultivation             | 3.61     | 7             | 479.6         | <0.001   |
| Experiment. Genotype. <i>Hpa</i>              | 11.72    | 3             | 551.8         | <0.001   |
| Experiment. Genotype. Cultivation. <i>Hpa</i> | 4.94     | 7             | 449.2         | <0.001   |
