# Supplementary material for: Impact of disease on diversity and productivity of plant populations
Source: PubMed Central journal article supplement (PMC4974914; doi:10.1111/1365-2435.12552), 2015-09-23
Supplement: FEC-30-649-s014.pdf [file FEC-30-649-s014.pdf]

**Table S6.** The effect of *Arabidopsis thaliana* genotypic diversity and *Hyaloperonospora arabidopsidis* (*Hpa*) on seed productivity in a pair-wise interaction experiment. A linear mixed model was used to analyse each factor and all interactions between them. Fixed effects included experimental repeat, genotype, cultivation (monoculture,/2-way mixture,/4-way mixture), *Hpa* (presence/absence) and cultivation (mixture/monoculture). Non-significant terms were eliminated from the model. *F* and *P* values refer to ANOVA tests of each factor separately and the interactions between them. N=1600.

| <b>Fixed term</b>                 | <b>F</b> | <b>n.d.f.</b> | <b>d.d.f.</b> | <b>P</b> |
|-----------------------------------|----------|---------------|---------------|----------|
| Experiment                        | 236.07   | 1             | 636.1         | <0.001   |
| Genotype                          | 1.65     | 3             | 1116.6        | 0.2      |
| Cultivation                       | 6.76     | 2             | 484.5         | 0.001    |
| <i>Hpa</i>                        | 0        | 1             | 635.0         | 0.98     |
| Experiment. Genotype              | 130.56   | 3             | 1111.8        | <0.001   |
| Genotype. Cultivation             | 6.44     | 6             | 1179.4        | <0.001   |
| Experiment. <i>Hpa</i>            | 60.04    | 1             | 636.6         | <0.001   |
| Genotype. <i>Hpa</i>              | 48.26    | 3             | 1112.9        | <0.001   |
| Experiment. Genotype. <i>Hpa</i>  | 10.09    | 3             | 1110.4        | <0.001   |
| Genotype. Cultivation. <i>Hpa</i> | 2.44     | 8             | 990.4         | 0.01     |
