# Supplementary material for: Impact of disease on diversity and productivity of plant populations
Source: PubMed Central journal article supplement (PMC4974914; doi:10.1111/1365-2435.12552), 2015-09-23
Supplement: FEC-30-649-s015.pdf [file FEC-30-649-s015.pdf]

**Table S7.** The effect of *Arabidopsis thaliana* genotypic diversity and *Turnip yellows virus* (TuYV) on days to flower in a pair-wise interaction experiment. Fixed effects included genotype, TuYV (presence/absence) and cultivation (mixture/monoculture). Non-significant terms were eliminated from the model. *F* and *P* values refer to ANOVA tests of each factor separately and the interactions between them. N=400.

| <b>Fixed term</b>           | <b>F</b> | <b>n.d.f.</b> | <b>d.d.f.</b> | <b>P</b> |
|-----------------------------|----------|---------------|---------------|----------|
| Genotype                    | 442.18   | 1             | 165.7         | <0.001   |
| TuYV                        | 3.55     | 1             | 164.4         | 0.06     |
| Cultivation                 | 9.52     | 1             | 164.6         | 0.002    |
| Genotype. TuYV              | 7.80     | 1             | 166.3         | 0.006    |
| TuYV. Cultivation           | 19.73    | 1             | 164.9         | <0.001   |
| Genotype. TuYV. Cultivation | 4.12     | 2             | 166.5         | 0.02     |
