# Supplementary material for: Impact of disease on diversity and productivity of plant populations
Source: PubMed Central journal article supplement (PMC4974914; doi:10.1111/1365-2435.12552), 2015-09-23
Supplement: FEC-30-649-s016.pdf [file FEC-30-649-s016.pdf]

**Table S8.** The effect of *Arabidopsis thaliana* genotypic diversity and *Turnip yellows virus* (TuYV) on rosette diameter in a pair-wise interaction experiment. Fixed effects included genotype, (TuYV) (presence/absence) and cultivation (mixture/monoculture). Non-significant terms were eliminated from the model. *F* and *P* values refer to ANOVA tests of each factor separately and the interactions between them. N=400.

| <b>Fixed term</b>     | <b>F</b> | <b>n.d.f.</b> | <b>d.d.f.</b> | <b>P</b> |
|-----------------------|----------|---------------|---------------|----------|
| Genotype              | 90.99    | 1             | 165.0         | <0.001   |
| TuYV                  | 3.5      | 1             | 165.0         | 0.06     |
| Cultivation           | 2.24     | 1             | 165.0         | 0.1      |
| Genotype. Cultivation | 3.96     | 1             | 165.0         | 0.05     |
