# Supplementary material for: Impact of disease on diversity and productivity of plant populations
Source: PubMed Central journal article supplement (PMC4974914; doi:10.1111/1365-2435.12552), 2015-09-23
Supplement: FEC-30-649-s017.pdf [file FEC-30-649-s017.pdf]

**Table S9.** The effect of *Arabidopsis thaliana* genotypic diversity and *Turnip yellows virus* (TuYV) on seed productivity in a pair-wise interaction experiment. A linear mixed model was used to analyse each factor and all interactions between them. Fixed effects included genotype, TuYV (presence/absence) and cultivation (mixture/monoculture). Non-significant terms were eliminated from the model. *F* and *P* values refer to ANOVA tests of each factor separately and the interactions between them. N=400.

| <b>Fixed term</b>           | <b>F</b> | <b>n.d.f.</b> | <b>d.d.f.</b> | <b>P</b> |
|-----------------------------|----------|---------------|---------------|----------|
| Genotype                    | 18.22    | 1             | 137.6         | <0.001   |
| TuYV                        | 72.51    | 1             | 138.0         | <0.001   |
| Cultivation                 | 0        | 1             | 137.8         | 0.9      |
| Genotype. TuYV              | 56.56    | 1             | 137.7         | <0.001   |
| Genotype. Cultivation       | 19.22    | 1             | 137.6         | <0.001   |
| Genotype. TuYV. Cultivation | 6.58     | 2             | 138.2         | 0.002    |
